# Supplementary material for: A Qualitative Investigation of Music Use among Amateur and Semi-Professional Golfers
Source: MDPI journal article supplement (doi:10.3390/sports7030060), 2019-03-05
Supplement: s1 [file s1]

## Table S1

*Summary of Domains, Categories, and Core Ideas*

---

| Domain, Category, and Core Idea                              | Frequency |
|--------------------------------------------------------------|-----------|
| <b>TEMPO</b>                                                 |           |
| Mental Synchronization Effects                               | General   |
| <i>Beat is helpful</i>                                       |           |
| <i>Play music in head when not listening to it</i>           |           |
| Wrong tempo can disrupt performance, disturb focus           |           |
| Physical Synchronization Effects                             | Typical   |
| <i>Choose music for purpose of tempo control in swing</i>    |           |
| <i>Match swing to tempo</i>                                  |           |
| <i>Compare music to metronome</i>                            |           |
| <b>ATTENTION</b>                                             |           |
| Music Functions as an Associative Mechanism                  | General   |
| <i>Music functions as a focus mechanism</i>                  |           |
| <i>Use music to concentrate on task</i>                      |           |
| <i>Use music to narrow focus to helpful thoughts</i>         |           |
| Music Functions as a Dissociative Mechanism                  | General   |
| <i>Use music as a distraction from other people</i>          |           |
| <i>Use music as a distraction from unhelpful thoughts</i>    |           |
| Music Serves as a Memory Cue                                 | Variant   |
| <i>Golf-related memories</i>                                 |           |
| <i>Non-golf-related memories</i>                             |           |
| <b>PHYSIOLOGICAL REGULATION</b>                              |           |
| Music Helps to Regulate Energy/Arousal Level                 | General   |
| <i>Music helps to increase my energy if I'm too sluggish</i> |           |
| <i>Music helps me to relax physically (calm nerves)</i>      |           |
| Music helps regulate physical "feeling" (tension in body)    |           |
| Music Choice is Sport-Specific                               | Variant   |
| <i>Choose different music in golf vs. other sports</i>       |           |
| <i>Optimal physiological arousal level</i>                   |           |
| Music Facilitates Physical Automaticity                      | Variant   |
| <i>Use music to become automatic in movements</i>            |           |

## PSYCHOLOGICAL REGULATION

|                                                                                          |         |
|------------------------------------------------------------------------------------------|---------|
| Music Helps to Regulate Mood                                                             | General |
| <i>Music keeps me calm</i>                                                               |         |
| <i>Music keeps me from getting too angry/frustrated</i>                                  |         |
| <i>Music puts me in a better mood (happy)</i>                                            |         |
| <i>I choose music based on my mood that day</i>                                          |         |
| <i>If a certain song comes on, it will change my mood</i>                                |         |
| Music Enhances Mental Performance State                                                  | General |
| <i>Music puts me in a better psychological/mental state to play (mental preparation)</i> |         |
| <i>Music helps me "bounce back" from poor performance (performance response)</i>         |         |
| <i>Music increases my confidence</i>                                                     |         |
| Music Increases Motivation                                                               | Typical |
| <i>Lyrics are motivational</i>                                                           |         |

## EFFECTS OF MUSIC ON PERFORMANCE PERCEPTIONS

|                                                                |         |
|----------------------------------------------------------------|---------|
| Music Affects Time Perception                                  | General |
| <i>Time goes faster when I listen to music</i>                 |         |
| Music Functions as a Performance Enhancer and Facilitates Flow | General |
| <i>I am more efficient when listening to music</i>             |         |
| <i>The task seems easier when listening to music</i>           |         |
| <i>Music directly enhances my performance</i>                  |         |
| <i>Music increases effort level</i>                            |         |
| <i>Music facilitates flow state, gets me "in the zone"</i>     |         |
| Music Improves the Qualitative Experience of the Task          | Typical |
| <i>Music makes golf more enjoyable</i>                         |         |
| <i>Music prevents me from getting bored</i>                    |         |

## TO USE OR NOT TO USE

|                                                                                    |         |
|------------------------------------------------------------------------------------|---------|
| Social/Individual – Music is used with other people and when practicing alone      | General |
| Setting – Listening to music is common during pre-performance routine and practice | General |
| Difficulty – Music may be unhelpful when learning new skills                       | Typical |
| Task – Music is used more often in putting vs. driving                             | Typical |
| Music is not commonly used in conjunction with imagery                             | Typical |

---

*Note.* General indicates responses from 9–10 participants (90–100%), Typical indicates responses from 6–8 participants (60–80%), and Variant responses from 2–5 participants (20–50%).
